# Supplementary material
Source: PubMed Central journal article supplement (PMC4127986)
Supplement: NIHMS413832-supplement-Supp_TableS1-S2.pdf [file NIHMS413832-supplement-Supp_TableS1-S2.pdf]

Supplementary Table S1. Top significant pairwise interaction results with meta-analysis  $P$  values  $< 10^{-6}$ 

| SNP1       | Chr | Position  | Nearest gene | SNP2       | Chr | Position  | Nearest gene | $P_{\text{Kansas City}}$ | $P_{\text{Omaha}}$ | $P_{\text{combine}}$ |
|------------|-----|-----------|--------------|------------|-----|-----------|--------------|--------------------------|--------------------|----------------------|
| rs6549904  | 3   | 28996413  | RBMS3        | rs4891159  | 18  | 72230929  | ZNF516       | 3.46E-06                 | 7.21E-07           | 3.64E-11             |
| rs7640046  | 3   | 29002568  | RBMS3        | rs4891159  | 18  | 72230929  | ZNF516       | 5.31E-06                 | 4.40E-07           | 5.06E-11             |
| rs10756576 | 9   | 14546659  | ZDHHC21      | rs4522433  | 16  | 79106759  | DYNLRB2      | 9.42E-05                 | 1.23E-04           | 6.41E-09             |
| rs6471974  | 8   | 62864711  | NKAIN3       | rs10893849 | 11  | 127701782 | ETS1         | 8.56E-06                 | 5.82E-03           | 1.91E-08             |
| rs1908458  | 8   | 62866300  | NKAIN3       | rs10893849 | 11  | 127701782 | ETS1         | 1.32E-05                 | 5.82E-03           | 2.66E-08             |
| rs11776993 | 8   | 134624191 | ST3GAL1      | rs12447454 | 16  | 9548238   | GRIN2A       | 3.54E-05                 | 5.20E-03           | 3.30E-08             |
| rs7539510  | 1   | 14183961  | RP1-21O18.1  | rs1004712  | 8   | 11659702  | NEIL2        | 1.45E-05                 | 2.68E-02           | 6.23E-08             |
| rs10918471 | 1   | 164697108 | FMO9P        | rs10509394 | 10  | 79646927  | LOC100132987 | 1.35E-06                 | 6.98E-03           | 1.14E-07             |
| rs1495010  | 8   | 62870287  | NKAIN3       | rs10893849 | 11  | 127701782 | ETS1         | 1.54E-05                 | 1.67E-02           | 1.34E-07             |
| rs1580702  | 8   | 62872226  | NKAIN3       | rs10893849 | 11  | 127701782 | ETS1         | 1.34E-05                 | 1.72E-02           | 1.42E-07             |
| rs637889   | 2   | 45785550  | PRKCE        | rs3852834  | 18  | 8806249   | KIAA0802     | 2.78E-05                 | 8.07E-03           | 1.84E-07             |
| rs10485887 | 7   | 77905991  | MAGI2        | rs7083541  | 10  | 30997484  | hCG_1783494  | 7.25E-06                 | 8.68E-03           | 2.06E-07             |
| rs10879389 | 12  | 70946050  | LOC283392    | rs10146130 | 14  | 74860052  | JDP2         | 6.88E-06                 | 2.87E-03           | 2.07E-07             |
| rs563601   | 2   | 45782134  | PRKCE        | rs3852834  | 18  | 8806249   | KIAA0802     | 2.35E-05                 | 1.21E-02           | 2.27E-07             |
| rs10918471 | 1   | 164697108 | FMO9P        | rs11002449 | 10  | 79645200  | LOC100132987 | 8.77E-07                 | 1.92E-02           | 2.31E-07             |
| rs2281675  | 6   | 114415711 | HS3ST5       | rs7237399  | 18  | 25925135  | DSC3         | 8.43E-06                 | 2.72E-02           | 2.50E-07             |
| rs7663120  | 4   | 170553723 | NEK1         | rs2209683  | 10  | 126805344 | CTBP2        | 1.85E-05                 | 1.48E-02           | 2.64E-07             |
| rs7621973  | 3   | 31781192  | OSBPL10      | rs13270346 | 8   | 116513427 | TRPS1        | 5.98E-05                 | 3.31E-02           | 2.71E-07             |
| rs563601   | 2   | 45782134  | PRKCE        | rs3852835  | 18  | 8806268   | KIAA0802     | 3.37E-05                 | 9.15E-03           | 2.91E-07             |
| rs2219250  | 3   | 31792548  | OSBPL10      | rs13270346 | 8   | 116513427 | TRPS1        | 6.08E-05                 | 4.69E-02           | 3.00E-07             |
| rs73143    | 1   | 108320393 | SLC25A24     | rs9908177  | 17  | 12243885  | MYOCD        | 5.07E-05                 | 2.90E-04           | 3.05E-07             |
| rs637889   | 2   | 45785550  | PRKCE        | rs3852835  | 18  | 8806268   | KIAA0802     | 3.97E-05                 | 8.07E-03           | 3.13E-07             |
| rs934797   | 2   | 60755669  | PAPOLG       | rs12800576 | 11  | 16552339  | C11orf58     | 3.70E-05                 | 3.73E-04           | 3.26E-07             |
| rs2281675  | 6   | 114415711 | HS3ST5       | rs1404433  | 18  | 25906347  | DSC3         | 8.01E-06                 | 3.02E-02           | 3.33E-07             |
| rs6804425  | 3   | 61975516  | PTPRG        | rs7765167  | 6   | 115801529 | FRK          | 6.04E-05                 | 1.41E-03           | 3.34E-07             |
| rs13128252 | 4   | 54408451  | RPL21P44     | rs7173810  | 15  | 86077060  | NTRK3        | 1.71E-06                 | 1.77E-02           | 3.68E-07             |
| rs17736191 | 4   | 54413060  | RPL21P44     | rs7173810  | 15  | 86077060  | NTRK3        | 1.43E-06                 | 1.77E-02           | 3.68E-07             |
| rs4334719  | 4   | 170598726 | NEK1         | rs2209683  | 10  | 126805344 | CTBP2        | 7.50E-06                 | 4.16E-02           | 3.81E-07             |
| rs6471974  | 8   | 62864711  | NKAIN3       | rs7131167  | 11  | 127709689 | ETS1         | 5.09E-06                 | 2.50E-02           | 3.88E-07             |
| rs1155384  | 7   | 145948580 | CNTNAP2      | rs1296023  | 8   | 11764226  | OR7E37P      | 4.90E-06                 | 1.61E-04           | 3.89E-07             |

|            |    |           |           |            |    |           |          |          |          |          |
|------------|----|-----------|-----------|------------|----|-----------|----------|----------|----------|----------|
| rs9830212  | 3  | 5405579   | GRM7      | rs2776938  | 10 | 33716916  | PARD3    | 1.56E-05 | 8.34E-03 | 3.92E-07 |
| rs4765961  | 12 | 2538733   | CACNA1C   | rs7991338  | 13 | 26349530  | RPS20P32 | 7.70E-06 | 4.45E-02 | 4.11E-07 |
| rs1890879  | 10 | 13589933  | PRPF18    | rs7301225  | 12 | 53324971  | DCD      | 1.31E-05 | 1.31E-02 | 4.48E-07 |
| rs2281675  | 6  | 114415711 | HS3ST5    | rs12326822 | 18 | 25939078  | DSC3     | 1.15E-05 | 2.72E-02 | 4.56E-07 |
| rs4334719  | 4  | 170598726 | NEK1      | rs11245509 | 10 | 126803951 | CTBP2    | 2.15E-05 | 4.29E-02 | 4.80E-07 |
| rs1043424  | 1  | 20849587  | PINK1     | rs821292   | 6  | 13499134  | GFOD1    | 3.02E-05 | 2.11E-02 | 4.84E-07 |
| rs1043443  | 1  | 20849967  | PINK1     | rs821292   | 6  | 13499134  | GFOD1    | 3.09E-05 | 2.18E-02 | 5.07E-07 |
| rs9830212  | 3  | 5405579   | GRM7      | rs2785262  | 10 | 33727661  | PARD3    | 1.82E-05 | 6.71E-03 | 5.15E-07 |
| rs6804425  | 3  | 61975516  | PTPRG     | rs4563753  | 6  | 115805961 | FRK      | 8.85E-05 | 1.78E-03 | 5.17E-07 |
| rs1908458  | 8  | 62866300  | NKAIN3    | rs7131167  | 11 | 127709689 | ETS1     | 8.06E-06 | 2.50E-02 | 5.37E-07 |
| rs10174893 | 2  | 59644897  | BCL11A    | rs6489635  | 12 | 5518325   | ANO2     | 2.32E-05 | 2.29E-02 | 5.43E-07 |
| rs2964607  | 5  | 151260601 | GLRA1     | rs990529   | 21 | 27268417  | GPX1     | 2.24E-05 | 6.17E-03 | 5.56E-07 |
| rs1155384  | 7  | 145948580 | CNTNAP2   | rs1619200  | 8  | 11772110  | OR7E37P  | 6.96E-07 | 1.16E-03 | 5.64E-07 |
| rs7663120  | 4  | 170553723 | NEK1      | rs11245509 | 10 | 126803951 | CTBP2    | 7.74E-05 | 1.60E-02 | 5.67E-07 |
| rs7663120  | 4  | 170553723 | NEK1      | rs2225079  | 10 | 126805026 | CTBP2    | 3.62E-05 | 1.48E-02 | 5.78E-07 |
| rs6553169  | 4  | 189361000 | RPL7AP27  | rs17816285 | 15 | 30826590  | FMN1     | 1.48E-05 | 1.51E-02 | 6.18E-07 |
| rs10209275 | 2  | 59644737  | BCL11A    | rs6489635  | 12 | 5518325   | ANO2     | 1.77E-05 | 3.52E-02 | 6.25E-07 |
| rs6804425  | 3  | 61975516  | PTPRG     | rs4624905  | 6  | 115805692 | FRK      | 9.97E-05 | 1.78E-03 | 6.64E-07 |
| rs1155384  | 7  | 145948580 | CNTNAP2   | rs1619003  | 8  | 11772027  | OR7E37P  | 1.11E-06 | 1.01E-03 | 6.65E-07 |
| rs563601   | 2  | 45782134  | PRKCE     | rs9954356  | 18 | 8807441   | KIAA0802 | 2.75E-05 | 1.01E-02 | 6.68E-07 |
| rs12153468 | 5  | 144429586 | LOC649660 | rs10757485 | 9  | 24762803  | TUSC1    | 2.01E-05 | 1.28E-02 | 6.78E-07 |
| rs4334719  | 4  | 170598726 | NEK1      | rs2225079  | 10 | 126805026 | CTBP2    | 1.55E-05 | 4.16E-02 | 6.87E-07 |
| rs6471974  | 8  | 62864711  | NKAIN3    | rs7120585  | 11 | 127710163 | ETS1     | 4.08E-05 | 2.35E-02 | 7.03E-07 |
| rs1919440  | 2  | 148236536 | RPL26P14  | rs4706822  | 6  | 80727674  | TTK      | 3.11E-06 | 1.74E-02 | 7.19E-07 |
| rs712082   | 1  | 222792683 | AKR1B1    | rs4303699  | 2  | 204176719 | ZNF207   | 2.22E-05 | 9.00E-03 | 7.20E-07 |
| rs1155384  | 7  | 145948580 | CNTNAP2   | rs2250903  | 8  | 11772593  | OR7E37P  | 1.45E-06 | 1.01E-03 | 7.53E-07 |
| rs712087   | 1  | 222797114 | AKR1B1    | rs4303699  | 2  | 204176719 | ZNF207   | 1.68E-05 | 1.22E-02 | 7.57E-07 |
| rs7728183  | 5  | 133822029 | PHF15     | rs3860254  | 12 | 79328607  | PTPRQ    | 3.44E-05 | 1.05E-02 | 7.81E-07 |
| rs2281675  | 6  | 114415711 | HS3ST5    | rs2949528  | 18 | 26041261  | DSC3     | 1.27E-05 | 4.64E-02 | 8.09E-07 |
| rs1474646  | 1  | 22314612  | WNT4      | rs10945517 | 6  | 168708391 | SMOC2    | 1.02E-05 | 7.97E-03 | 8.29E-07 |
| rs9321715  | 6  | 139732764 | CITED2    | rs221303   | 7  | 157062744 | PTPRN2   | 5.38E-05 | 1.21E-02 | 8.36E-07 |
| rs10497022 | 2  | 148247215 | RPL26P14  | rs4706822  | 6  | 80727674  | TTK      | 3.27E-06 | 1.87E-02 | 9.11E-07 |

|           |   |           |         |            |    |           |              |          |          |          |
|-----------|---|-----------|---------|------------|----|-----------|--------------|----------|----------|----------|
| rs9691874 | 7 | 145936108 | CNTNAP2 | rs1296023  | 8  | 11764226  | OR7E37P      | 7.91E-06 | 2.80E-04 | 9.30E-07 |
| rs210643  | 6 | 118007976 | GOPC    | rs11784259 | 8  | 87285716  | LOC100128962 | 9.55E-05 | 4.06E-02 | 9.57E-07 |
| rs1908458 | 8 | 62866300  | NKAIN3  | rs7120585  | 11 | 127710163 | ETS1         | 6.30E-05 | 2.35E-02 | 9.71E-07 |

---

Supplementary Table S2. Significant pairwise interaction results contained genes identified by previous GWASs with  $P$  values  $< 10^{-4}$  in the discovery sample.

| SNP1       | Chr | Position  | Nearest gene | SNP2       | Chr | Position  | Nearest gene | $P$      | Gene_GWAS |
|------------|-----|-----------|--------------|------------|-----|-----------|--------------|----------|-----------|
| rs10520962 | 5   | 31130875  | LOC100128783 | rs1569788  | 6   | 152370309 | ESR1         | 2.08E-07 | ESR1      |
| rs7825904  | 8   | 119998469 | TNFRSF11B    | rs4773340  | 13  | 110747254 | ARHGEF7      | 4.10E-07 | TNFRSF11B |
| rs6980043  | 7   | 120733990 | WNT16        | rs3099412  | 8   | 95593385  | KIAA1429     | 1.52E-06 | WNT16     |
| rs17779721 | 17  | 67898631  | SLC39A11     | rs1805034  | 18  | 58178221  | TNFRSF11A    | 2.12E-06 | TNFRSF11A |
| rs1604333  | 7   | 121615520 | RPL31P49     | rs7950287  | 11  | 16448694  | SOX6         | 3.77E-06 | SOX6      |
| rs11577288 | 1   | 240836130 | LOC100130133 | rs2673406  | 10  | 79061590  | KCNMA1       | 4.32E-06 | KCNMA1    |
| rs10276111 | 7   | 120711574 | C7orf58      | rs3099412  | 8   | 95593385  | KIAA1429     | 5.08E-06 | C7orf58   |
| rs980994   | 10  | 10590219  | LOC254312    | rs11598926 | 10  | 79034570  | KCNMA1       | 5.65E-06 | KCNMA1    |
| rs1592830  | 5   | 103182634 | RAB9P1       | rs12864265 | 13  | 41912464  | TNFSF11      | 5.99E-06 | TNFSF11   |
| rs10484632 | 6   | 20755639  | CDKAL1       | rs2487052  | 9   | 106726226 | ABCA1        | 6.91E-06 | CDKAL1    |
| rs2304607  | 5   | 88024489  | MEF2C        | rs7306977  | 12  | 8379556   | LOC100130675 | 7.25E-06 | MEF2C     |
| rs935066   | 2   | 101106537 | TBC1D8       | rs6807784  | 3   | 156618733 | PLCH1        | 7.36E-06 | TBC1D8    |
| rs732136   | 2   | 101106663 | TBC1D8       | rs7203610  | 16  | 86246069  | JPH3         | 7.63E-06 | TBC1D8    |
| rs1856859  | 6   | 151901803 | C6orf97      | rs1859526  | 7   | 70527975  | WBSCR17      | 8.19E-06 | C6orf97   |
| rs3020306  | 6   | 152107579 | ESR1         | rs10980253 | 9   | 112007656 | C9orf152     | 8.41E-06 | ESR1      |
| rs2144025  | 6   | 152349399 | ESR1         | rs8140216  | 22  | 25474070  | RPL15P3      | 8.75E-06 | ESR1      |
| rs1474646  | 1   | 22314612  | WNT4         | rs4496325  | 2   | 222679239 | PAX3         | 8.76E-06 | WNT4      |
| rs4610191  | 3   | 148133577 | RPL21P7      | rs2982712  | 6   | 152399872 | ESR1         | 8.96E-06 | ESR1      |
| rs2392540  | 7   | 38225879  | STARD3NL     | rs7117376  | 11  | 6943002   | ZNF214       | 9.06E-06 | STARD3NL  |
| rs11947850 | 4   | 189873281 | MTRF1L       | rs2144025  | 6   | 152349399 | ESR1         | 9.19E-06 | ESR1      |
| rs324445   | 5   | 32489782  | SUB1         | rs2709117  | 7   | 37754332  | TXNDC3       | 9.76E-06 | TXNDC3    |
| rs12664544 | 6   | 152350666 | ESR1         | rs6497978  | 16  | 26891866  | C16orf82     | 1.01E-05 | ESR1      |
| rs1474646  | 1   | 22314612  | WNT4         | rs10945517 | 6   | 168708391 | SMOC2        | 1.02E-05 | WNT4      |
| rs343693   | 6   | 80676567  | ELOVL4       | rs2673406  | 10  | 79061590  | KCNMA1       | 1.03E-05 | KCNMA1    |
| rs12141338 | 1   | 91934579  | TGFBR3       | rs10997502 | 10  | 52859083  | PRKG1        | 1.03E-05 | TGFBR3    |
| rs2152750  | 6   | 152111838 | ESR1         | rs4904964  | 14  | 92169620  | RIN3         | 1.05E-05 | ESR1      |
| rs7746383  | 6   | 21249984  | CDKAL1       | rs6569099  | 6   | 120401401 | C6orf170     | 1.07E-05 | CDKAL1    |
| rs747994   | 6   | 168673607 | SMOC2        | rs4740349  | 9   | 132430323 | FUBP3        | 1.10E-05 | FUBP3     |
| rs2982573  | 6   | 152052227 | ESR1         | rs10121052 | 9   | 101316897 | NR4A3        | 1.11E-05 | ESR1      |

|            |    |           |              |            |    |           |           |          |           |
|------------|----|-----------|--------------|------------|----|-----------|-----------|----------|-----------|
| rs2060712  | 7  | 37858182  | TXNDC3       | rs6496602  | 15 | 88118801  | MESP2     | 1.13E-05 | TXNDC3    |
| rs1878001  | 10 | 79048564  | KCNMA1       | rs4778541  | 15 | 21288717  | MKRN3     | 1.36E-05 | KCNMA1    |
| rs7960190  | 12 | 27838186  | KLHDC5       | rs2025009  | 14 | 67913358  | RAD51L1   | 1.49E-05 | KLHDC5    |
| rs13250845 | 8  | 1903503   | LOC100128157 | rs10219384 | 11 | 16285545  | SOX6      | 1.61E-05 | SOX6      |
| rs2673406  | 10 | 79061590  | KCNMA1       | rs10835345 | 11 | 28455085  | LOC729560 | 1.62E-05 | KCNMA1    |
| rs2392540  | 7  | 38225879  | STARD3NL     | rs7025595  | 9  | 14544281  | ZDHHC21   | 1.63E-05 | STARD3NL  |
| rs4658112  | 1  | 91981254  | TGFBR3       | rs446095   | 5  | 3233897   | IRX1      | 1.67E-05 | TGFBR3    |
| rs4538346  | 3  | 55582669  | ERC2         | rs2068011  | 11 | 15642254  | SOX6      | 1.69E-05 | SOX6      |
| rs12226164 | 11 | 15666021  | SOX6         | rs11658445 | 17 | 9657243   | LOC644070 | 1.71E-05 | SOX6      |
| rs12703305 | 7  | 152778648 | LOC100134791 | rs1878002  | 10 | 79048513  | KCNMA1    | 1.73E-05 | KCNMA1    |
| rs7648547  | 3  | 41163004  | CTNNB1       | rs17273109 | 8  | 59730729  | NSMAF     | 1.74E-05 | CTNNB1    |
| rs7943358  | 11 | 15642146  | SOX6         | rs526045   | 15 | 48432822  | FLJ10038  | 1.77E-05 | SOX6      |
| rs3007737  | 1  | 239787182 | KMO          | rs2059601  | 3  | 41179831  | CTNNB1    | 1.79E-05 | CTNNB1    |
| rs7543680  | 1  | 22603856  | ZBTB40       | rs2410252  | 21 | 40789136  | DSCAM     | 1.82E-05 | ZBTB40    |
| rs9479191  | 6  | 152434853 | ESR1         | rs3866769  | 14 | 85183606  | LOC283584 | 1.84E-05 | ESR1      |
| rs9357538  | 6  | 47479851  | CD2AP        | rs10407255 | 19 | 38272990  | GPATCH1   | 1.87E-05 | GPATCH1   |
| rs6540600  | 1  | 208734374 | HHAT         | rs508520   | 9  | 132382930 | FUBP3     | 1.91E-05 | FUBP3     |
| rs1872426  | 8  | 120018937 | TNFRSF11B    | rs1453590  | 11 | 99271543  | CNTN5     | 1.97E-05 | TNFRSF11B |
| rs10407255 | 19 | 38272990  | GPATCH1      | rs2178900  | 21 | 14743232  | SAMSN1    | 1.99E-05 | GPATCH1   |
| rs1864803  | 2  | 221744156 | EPHA4        | rs227811   | 6  | 44779065  | SUPT3H    | 1.99E-05 | SUPT3H    |
| rs1124674  | 6  | 152122428 | ESR1         | rs2269640  | 22 | 24667911  | MYO18B    | 2.09E-05 | ESR1      |
| rs851983   | 6  | 152066108 | ESR1         | rs3940268  | 7  | 24179221  | NPY       | 2.21E-05 | ESR1      |
| rs1919440  | 2  | 148236536 | RPL26P14     | rs35799    | 10 | 78905237  | KCNMA1    | 2.23E-05 | KCNMA1    |
| rs2709115  | 7  | 37756850  | TXNDC3       | rs2505126  | 10 | 30429832  | LOC729663 | 2.24E-05 | TXNDC3    |
| rs16826899 | 3  | 158093361 | LEKR1        | rs12947580 | 17 | 73279820  | TNRC6C    | 2.25E-05 | LEKR1     |
| rs2060712  | 7  | 37858182  | TXNDC3       | rs10254420 | 7  | 103330137 | RELN      | 2.28E-05 | TXNDC3    |
| rs2241700  | 5  | 133936959 | PHF15        | rs4237709  | 11 | 15408823  | SOX6      | 2.30E-05 | SOX6      |
| rs17410426 | 7  | 38213188  | STARD3NL     | rs7868862  | 9  | 14820821  | FREM1     | 2.31E-05 | STARD3NL  |
| rs560737   | 2  | 80084980  | CTNNA2       | rs10824453 | 10 | 78270634  | KCNMA1    | 2.36E-05 | KCNMA1    |
| rs9874196  | 3  | 141233155 | CLSTN2       | rs2350987  | 11 | 15290007  | SOX6      | 2.45E-05 | SOX6      |
| rs6550509  | 3  | 37818821  | ITGA9        | rs7126053  | 11 | 15412541  | SOX6      | 2.54E-05 | SOX6      |
| rs1884051  | 6  | 152324972 | ESR1         | rs3780414  | 9  | 4547165   | SLC1A1    | 2.56E-05 | ESR1      |

|            |    |           |           |            |    |           |           |          |           |
|------------|----|-----------|-----------|------------|----|-----------|-----------|----------|-----------|
| rs7578753  | 2  | 180809183 | LOC729009 | rs7748205  | 6  | 152321384 | ESR1      | 2.61E-05 | ESR1      |
| rs188750   | 6  | 86099356  | LOC389787 | rs2982561  | 6  | 152094345 | ESR1      | 2.62E-05 | ESR1      |
| rs2803245  | 1  | 63105798  | LOC199897 | rs2722269  | 7  | 37845491  | TXNDC3    | 2.64E-05 | TXNDC3    |
| rs4233289  | 1  | 22663042  | ZBTB40    | rs3798009  | 5  | 9491120   | SEMA5A    | 2.68E-05 | ZBTB40    |
| rs2718045  | 7  | 37761963  | TXNDC3    | rs11633980 | 15 | 88056559  | WDR93     | 2.71E-05 | TXNDC3    |
| rs7108091  | 11 | 16155907  | SOX6      | rs12965133 | 18 | 53954741  | NEDD4L    | 2.80E-05 | SOX6      |
| rs10219384 | 11 | 16285545  | SOX6      | rs740862   | 16 | 3629679   | DNASE1    | 2.86E-05 | SOX6      |
| rs9651118  | 1  | 11784801  | MTHFR     | rs4622244  | 11 | 15345285  | SOX6      | 2.86E-05 | SOX6      |
| rs2140648  | 7  | 120684197 | C7orf58   | rs7242929  | 18 | 54105844  | NEDD4L    | 2.87E-05 | C7orf58   |
| rs3789080  | 2  | 111514002 | ACOXL     | rs6456356  | 6  | 20649498  | CDKAL1    | 2.95E-05 | CDKAL1    |
| rs7324017  | 13 | 46304846  | HTR2A     | rs17250080 | 16 | 49664360  | SALL1     | 2.96E-05 | SALL1     |
| rs433030   | 4  | 2785430   | ADD1      | rs7992970  | 13 | 41843463  | TNFSF11   | 3.21E-05 | TNFSF11   |
| rs1124615  | 1  | 30928177  | MATN1     | rs10276111 | 7  | 120711574 | C7orf58   | 3.30E-05 | C7orf58   |
| rs508609   | 9  | 132382895 | FUBP3     | rs9617449  | 22 | 47578169  | C22orf34  | 3.30E-05 | FUBP3     |
| rs4714085  | 6  | 37703524  | MDGA1     | rs2709115  | 7  | 37756850  | TXNDC3    | 3.31E-05 | TXNDC3    |
| rs3109398  | 3  | 183884795 | ATP11B    | rs10762731 | 10 | 78297136  | KCNMA1    | 3.36E-05 | KCNMA1    |
| rs11808673 | 1  | 193939480 | KCNT2     | rs3798573  | 6  | 152431055 | ESR1      | 3.37E-05 | ESR1      |
| rs10974449 | 9  | 4301035   | SLC1A1    | rs10411529 | 19 | 38308096  | GPATCH1   | 3.37E-05 | GPATCH1   |
| rs2982573  | 6  | 152052227 | ESR1      | rs7181556  | 15 | 65263822  | SMAD3     | 3.49E-05 | ESR1      |
| rs7350480  | 11 | 15387984  | SOX6      | rs732428   | 17 | 6909787   | CLEC10A   | 3.49E-05 | SOX6      |
| rs9861544  | 3  | 8519420   | LMCD1     | rs851980   | 6  | 152069648 | ESR1      | 3.55E-05 | ESR1      |
| rs10444354 | 11 | 105770115 | GUCY1A2   | rs17250080 | 16 | 49664360  | SALL1     | 3.58E-05 | SALL1     |
| rs10740382 | 10 | 72939302  | CDH23     | rs1528603  | 16 | 49691149  | SALL1     | 3.62E-05 | SALL1     |
| rs12141338 | 1  | 91934579  | TGFBR3    | rs2657940  | 19 | 57555648  | LOC400713 | 3.64E-05 | TGFBR3    |
| rs2585581  | 4  | 40789993  | APBB2     | rs1322667  | 6  | 44577984  | SUPT3H    | 3.65E-05 | SUPT3H    |
| rs13322318 | 3  | 158106964 | LEKR1     | rs7925817  | 11 | 93483682  | HEPHL1    | 3.75E-05 | LEKR1     |
| rs4566860  | 6  | 92010671  | EPHA7     | rs8094884  | 18 | 58179108  | TNFRSF11A | 3.82E-05 | TNFRSF11A |
| rs3923657  | 4  | 151138248 | DCLK2     | rs10276111 | 7  | 120711574 | C7orf58   | 3.85E-05 | C7orf58   |
| rs2304607  | 5  | 88024489  | MEF2C     | rs1830006  | 7  | 17794410  | SNX13     | 3.89E-05 | MEF2C     |
| rs11184966 | 1  | 107033761 | PRMT6     | rs4870042  | 6  | 151929746 | C6orf97   | 3.92E-05 | C6orf97   |
| rs17573483 | 1  | 91990833  | TGFBR3    | rs2029686  | 12 | 49851069  | TFCP2     | 3.93E-05 | TGFBR3    |
| rs584763   | 1  | 39631085  | MACF1     | rs1528603  | 16 | 49691149  | SALL1     | 3.94E-05 | SALL1     |

|            |    |           |           |            |    |           |           |          |           |
|------------|----|-----------|-----------|------------|----|-----------|-----------|----------|-----------|
| rs1293935  | 6  | 152059651 | ESR1      | rs1652704  | 10 | 76793657  | ZNF503    | 3.95E-05 | ESR1      |
| rs10814562 | 9  | 37482440  | POLR1E    | rs912423   | 13 | 41949804  | TNFSF11   | 3.98E-05 | TNFSF11   |
| rs9460540  | 6  | 20756741  | CDKAL1    | rs7328604  | 13 | 19128525  | MPHOSPH8  | 4.02E-05 | CDKAL1    |
| rs4459911  | 3  | 104598179 | ALCAM     | rs7746383  | 6  | 21249984  | CDKAL1    | 4.07E-05 | CDKAL1    |
| rs851985   | 6  | 152062083 | ESR1      | rs881365   | 11 | 103340769 | PDGFD     | 4.13E-05 | ESR1      |
| rs1124674  | 6  | 152122428 | ESR1      | rs6042169  | 20 | 13421863  | TASP1     | 4.13E-05 | ESR1      |
| rs1878449  | 4  | 155107054 | DCHS2     | rs1322667  | 6  | 44577984  | SUPT3H    | 4.21E-05 | SUPT3H    |
| rs7825904  | 8  | 119998469 | TNFRSF11B | rs766509   | 13 | 46528047  | SUCLA2    | 4.25E-05 | TNFRSF11B |
| rs4655071  | 1  | 22700518  | ZBTB40    | rs12647173 | 4  | 110352489 | COL25A1   | 4.32E-05 | ZBTB40    |
| rs2709115  | 7  | 37756850  | TXNDC3    | rs1764967  | 13 | 85155608  | SLITRK6   | 4.35E-05 | TXNDC3    |
| rs33983617 | 3  | 83841518  | CADM2     | rs1353171  | 8  | 119942179 | TNFRSF11B | 4.37E-05 | TNFRSF11B |
| rs4335008  | 6  | 148379845 | SASH1     | rs11002065 | 10 | 78605177  | KCNMA1    | 4.44E-05 | KCNMA1    |
| rs1453590  | 11 | 99271543  | CNTN5     | rs6077869  | 20 | 10598510  | JAG1      | 4.46E-05 | JAG1      |
| rs7825904  | 8  | 119998469 | TNFRSF11B | rs2417349  | 12 | 14472716  | ATF7IP    | 4.48E-05 | TNFRSF11B |
| rs16826899 | 3  | 158093361 | LEKR1     | rs2105815  | 22 | 20861074  | VPREB1    | 4.51E-05 | LEKR1     |
| rs1561473  | 2  | 212410671 | ERBB4     | rs4680317  | 3  | 158139447 | LEKR1     | 4.53E-05 | LEKR1     |
| rs433030   | 4  | 2785430   | ADD1      | rs8094884  | 18 | 58179108  | TNFRSF11A | 4.58E-05 | TNFRSF11A |
| rs3739455  | 9  | 111940828 | AKAP2     | rs2350987  | 11 | 15290007  | SOX6      | 4.61E-05 | SOX6      |
| rs2688994  | 3  | 126300783 | SLC12A8   | rs35799    | 10 | 78905237  | KCNMA1    | 4.68E-05 | KCNMA1    |
| rs13205111 | 6  | 91173066  | MAP3K7    | rs2287681  | 19 | 38300573  | GPATCH1   | 4.72E-05 | GPATCH1   |
| rs2144025  | 6  | 152349399 | ESR1      | rs9608667  | 22 | 26870492  | TTC28     | 4.74E-05 | ESR1      |
| rs221295   | 7  | 157055372 | PTPRN2    | rs4237709  | 11 | 15408823  | SOX6      | 4.78E-05 | SOX6      |
| rs3094584  | 6  | 31491827  | MICB      | rs2982561  | 6  | 152094345 | ESR1      | 4.82E-05 | ESR1      |
| rs2371868  | 7  | 83072658  | SEMA3E    | rs2707520  | 7  | 120738380 | WNT16     | 4.92E-05 | WNT16     |
| rs9864310  | 3  | 131589599 | COL29A1   | rs2982554  | 6  | 152099703 | ESR1      | 4.97E-05 | ESR1      |
| rs2982712  | 6  | 152399872 | ESR1      | rs961291   | 16 | 63371599  | CDH11     | 5.00E-05 | ESR1      |
| rs6970138  | 7  | 157119751 | PTPRN2    | rs2280163  | 10 | 79049943  | KCNMA1    | 5.00E-05 | KCNMA1    |
| rs12783211 | 10 | 71116553  | COL13A1   | rs7897566  | 10 | 78626486  | KCNMA1    | 5.08E-05 | KCNMA1    |
| rs1569788  | 6  | 152370309 | ESR1      | rs1861829  | 9  | 89439873  | DAPK1     | 5.21E-05 | ESR1      |
| rs11678215 | 2  | 203769134 | NBEAL1    | rs16826899 | 3  | 158093361 | LEKR1     | 5.40E-05 | LEKR1     |
| rs6980043  | 7  | 120733990 | WNT16     | rs12674047 | 7  | 157987469 | PTPRN2    | 5.49E-05 | WNT16     |
| rs10219384 | 11 | 16285545  | SOX6      | rs2223667  | 20 | 6868193   | FUSIP1    | 5.53E-05 | SOX6      |

|            |    |           |              |            |    |           |              |          |           |
|------------|----|-----------|--------------|------------|----|-----------|--------------|----------|-----------|
| rs2059601  | 3  | 41179831  | CTNNB1       | rs8054026  | 16 | 9549520   | GRIN2A       | 5.58E-05 | CTNNB1    |
| rs2059601  | 3  | 41179831  | CTNNB1       | rs12543533 | 8  | 71608082  | TRAM1        | 5.59E-05 | CTNNB1    |
| rs9462994  | 6  | 44601697  | SUPT3H       | rs2189303  | 17 | 33134218  | HNF1B        | 5.59E-05 | SUPT3H    |
| rs2485024  | 1  | 6122264   | CHD5         | rs4620684  | 11 | 16135202  | SOX6         | 5.70E-05 | SOX6      |
| rs1973857  | 4  | 105124930 | CXXC4        | rs12770151 | 10 | 79046051  | KCNMA1       | 5.79E-05 | KCNMA1    |
| rs6686484  | 1  | 35141347  | DLGAP3       | rs11773477 | 7  | 38204644  | STARD3NL     | 5.92E-05 | STARD3NL  |
| rs10196263 | 2  | 67365492  | ETAA1        | rs4680317  | 3  | 158139447 | LEKR1        | 5.97E-05 | LEKR1     |
| rs17573483 | 1  | 91990833  | TGFBR3       | rs4374263  | 18 | 73915290  | LOC100132713 | 6.17E-05 | TGFBR3    |
| rs9469220  | 6  | 32766288  | LOC731881    | rs12959396 | 18 | 58190289  | TNFRSF11A    | 6.22E-05 | TNFRSF11A |
| rs3821719  | 3  | 156345782 | MME          | rs1871859  | 6  | 151940199 | C6orf97      | 6.23E-05 | C6orf97   |
| rs12697671 | 5  | 25965589  | CDH9         | rs3941951  | 7  | 38152948  | STARD3NL     | 6.23E-05 | STARD3NL  |
| rs16829861 | 2  | 134446170 | MGAT5        | rs7772579  | 6  | 152084195 | ESR1         | 6.26E-05 | ESR1      |
| rs10198823 | 2  | 75319067  | FAM176A      | rs7905490  | 10 | 28607813  | MPP7         | 6.29E-05 | MPP7      |
| rs851983   | 6  | 152066108 | ESR1         | rs6602437  | 10 | 6170083   | RBM17        | 6.32E-05 | ESR1      |
| rs243204   | 14 | 89119255  | FOXP3        | rs3826906  | 19 | 38312737  | GPATCH1      | 6.38E-05 | GPATCH1   |
| rs9844054  | 3  | 158158010 | LEKR1        | rs9617449  | 22 | 47578169  | C22orf34     | 6.41E-05 | LEKR1     |
| rs10276111 | 7  | 120711574 | C7orf58      | rs12674047 | 7  | 157987469 | PTPRN2       | 6.46E-05 | C7orf58   |
| rs11039014 | 11 | 46851954  | LRP4         | rs11826705 | 11 | 115474199 | BUD13        | 6.47E-05 | LRP4      |
| rs2290884  | 11 | 46846964  | LRP4         | rs485152   | 19 | 60840201  | ZNF580       | 6.50E-05 | LRP4      |
| rs4740349  | 9  | 132430323 | FUBP3        | rs6118078  | 20 | 8056714   | PLCB1        | 6.70E-05 | FUBP3     |
| rs714830   | 6  | 20732361  | CDKAL1       | rs310963   | 13 | 61870441  | LOC729287    | 6.76E-05 | CDKAL1    |
| rs7559325  | 2  | 101097003 | TBC1D8       | rs7184673  | 16 | 12950953  | LOC729993    | 6.79E-05 | TBC1D8    |
| rs2092322  | 1  | 22308310  | WNT4         | rs7784118  | 7  | 97095028  | TAC1         | 6.82E-05 | WNT4      |
| rs12545037 | 8  | 49422210  | RPL29P15     | rs1353171  | 8  | 119942179 | TNFRSF11B    | 6.84E-05 | TNFRSF11B |
| rs7792547  | 7  | 150754462 | CRYGN        | rs11023860 | 11 | 16152517  | SOX6         | 6.94E-05 | SOX6      |
| rs2722334  | 7  | 37833561  | TXNDC3       | rs688244   | 11 | 102543737 | DYNC2H1      | 7.07E-05 | TXNDC3    |
| rs12630133 | 3  | 148852874 | LOC644037    | rs3020348  | 6  | 152099607 | ESR1         | 7.16E-05 | ESR1      |
| rs9374354  | 6  | 113093307 | RPS27AP11    | rs3941951  | 7  | 38152948  | STARD3NL     | 7.22E-05 | STARD3NL  |
| rs732136   | 2  | 101106663 | TBC1D8       | rs35411253 | 4  | 157855306 | PDGFC        | 7.22E-05 | TBC1D8    |
| rs1468115  | 17 | 47147884  | CA10         | rs2287680  | 19 | 38300406  | GPATCH1      | 7.25E-05 | GPATCH1   |
| rs2161228  | 5  | 88037554  | MEF2C        | rs4483108  | 8  | 33171375  | FUT10        | 7.28E-05 | MEF2C     |
| rs2094708  | 9  | 78913952  | RP11-470P4.2 | rs1496437  | 16 | 49671075  | SALL1        | 7.37E-05 | SALL1     |



|            |    |           |          |            |    |           |              |          |          |
|------------|----|-----------|----------|------------|----|-----------|--------------|----------|----------|
| rs17511666 | 1  | 91899190  | TGFBR3   | rs12591624 | 15 | 56553189  | LIPC         | 7.43E-05 | TGFBR3   |
| rs6899458  | 6  | 152093736 | ESR1     | rs10111751 | 8  | 10893862  | XKR6         | 7.47E-05 | ESR1     |
| rs2718045  | 7  | 37761963  | TXNDC3   | rs9805112  | 12 | 23803313  | SOX5         | 7.47E-05 | TXNDC3   |
| rs16826899 | 3  | 158093361 | LEKR1    | rs8002365  | 13 | 60487773  | PCDH20       | 7.49E-05 | LEKR1    |
| rs4655071  | 1  | 22700518  | ZBTB40   | rs16893884 | 6  | 40743388  | UNC5CL       | 7.49E-05 | ZBTB40   |
| rs7950287  | 11 | 16448694  | SOX6     | rs1669867  | 15 | 50534153  | MYO5A        | 7.54E-05 | SOX6     |
| rs670495   | 1  | 114477152 | SYT6     | rs7950287  | 11 | 16448694  | SOX6         | 7.59E-05 | SOX6     |
| rs7905490  | 10 | 28607813  | MPP7     | rs10160549 | 11 | 129121757 | LOC729717    | 7.61E-05 | MPP7     |
| rs935066   | 2  | 101106537 | TBC1D8   | rs7670682  | 4  | 97759896  | COX7A2       | 7.65E-05 | TBC1D8   |
| rs2270353  | 2  | 29794324  | ALK      | rs3020396  | 6  | 152321571 | ESR1         | 7.69E-05 | ESR1     |
| rs2161228  | 5  | 88037554  | MEF2C    | rs10884451 | 10 | 109025397 | LOC100128304 | 7.70E-05 | MEF2C    |
| rs1883570  | 1  | 19965212  | TMCO4    | rs6077869  | 20 | 10598510  | JAG1         | 7.71E-05 | JAG1     |
| rs4620684  | 11 | 16135202  | SOX6     | rs2723840  | 12 | 11845170  | ETV6         | 7.71E-05 | SOX6     |
| rs4740349  | 9  | 132430323 | FUBP3    | rs10734537 | 11 | 45658151  | SLC35C1      | 7.80E-05 | FUBP3    |
| rs754387   | 6  | 88935578  | ACTB     | rs12864265 | 13 | 41912464  | TNFSF11      | 7.80E-05 | TNFSF11  |
| rs6456356  | 6  | 20649498  | CDKAL1   | rs10733852 | 10 | 70841974  | TACR2        | 7.82E-05 | CDKAL1   |
| rs2709115  | 7  | 37756850  | TXNDC3   | rs6031224  | 20 | 41980953  | TOX2         | 7.85E-05 | TXNDC3   |
| rs6790074  | 3  | 58592552  | FAM3D    | rs3020306  | 6  | 152107579 | ESR1         | 7.93E-05 | ESR1     |
| rs523684   | 3  | 9014469   | SRGAP3   | rs2280163  | 10 | 79049943  | KCNMA1       | 7.94E-05 | KCNMA1   |
| rs9345145  | 6  | 92295792  | EPHA7    | rs35799    | 10 | 78905237  | KCNMA1       | 7.97E-05 | KCNMA1   |
| rs6543018  | 2  | 101096720 | TBC1D8   | rs879465   | 3  | 55173929  | WNT5A        | 8.02E-05 | TBC1D8   |
| rs2304607  | 5  | 88024489  | MEF2C    | rs17602    | 16 | 1965679   | TBL3         | 8.06E-05 | MEF2C    |
| rs10980253 | 9  | 112007656 | C9orf152 | rs10824453 | 10 | 78270634  | KCNMA1       | 8.09E-05 | KCNMA1   |
| rs7559325  | 2  | 101097003 | TBC1D8   | rs12109110 | 5  | 23881638  | AKTIP        | 8.10E-05 | TBC1D8   |
| rs17573483 | 1  | 91990833  | TGFBR3   | rs9366375  | 6  | 21187552  | CDKAL1       | 8.12E-05 | CDKAL1   |
| rs1124615  | 1  | 30928177  | MATN1    | rs6980043  | 7  | 120733990 | WNT16        | 8.20E-05 | WNT16    |
| rs2144025  | 6  | 152349399 | ESR1     | rs979672   | 8  | 104186687 | C8orf56      | 8.23E-05 | ESR1     |
| rs10973396 | 9  | 37518290  | FBXO10   | rs912423   | 13 | 41949804  | TNFSF11      | 8.29E-05 | TNFSF11  |
| rs7798775  | 7  | 43114490  | HECW1    | rs10219384 | 11 | 16285545  | SOX6         | 8.32E-05 | SOX6     |
| rs4520068  | 7  | 38226580  | STARD3NL | rs10509319 | 10 | 71072908  | COL13A1      | 8.38E-05 | STARD3NL |
| rs4921534  | 5  | 159254801 | ADRA1B   | rs4391273  | 6  | 151934766 | C6orf97      | 8.39E-05 | C6orf97  |
| rs12636705 | 3  | 176241333 | NAALADL2 | rs6939622  | 6  | 21202717  | CDKAL1       | 8.39E-05 | CDKAL1   |

|            |    |           |             |            |    |           |              |          |           |
|------------|----|-----------|-------------|------------|----|-----------|--------------|----------|-----------|
| rs4740349  | 9  | 132430323 | FUBP3       | rs914695   | 10 | 44752265  | RASSF4       | 8.40E-05 | FUBP3     |
| rs7036157  | 9  | 111985595 | C9orf152    | rs2350987  | 11 | 15290007  | SOX6         | 8.42E-05 | SOX6      |
| rs1298942  | 6  | 44762349  | SUPT3H      | rs1125432  | 10 | 33762754  | PARD3        | 8.42E-05 | SUPT3H    |
| rs735876   | 7  | 25893896  | NFE2L3      | rs17171172 | 7  | 37839175  | TXNDC3       | 8.50E-05 | TXNDC3    |
| rs2709115  | 7  | 37756850  | TXNDC3      | rs6415582  | 8  | 59807828  | TOX          | 8.51E-05 | TXNDC3    |
| rs2351793  | 4  | 47331977  | CORIN       | rs8094884  | 18 | 58179108  | TNFRSF11A    | 8.52E-05 | TNFRSF11A |
| rs6543018  | 2  | 101096720 | TBC1D8      | rs7857243  | 9  | 38399081  | IGFBPL1      | 8.54E-05 | TBC1D8    |
| rs3020306  | 6  | 152107579 | ESR1        | rs2762917  | 20 | 52166451  | CYP24A1      | 8.61E-05 | ESR1      |
| rs6899458  | 6  | 152093736 | ESR1        | rs4731451  | 7  | 127841336 | C7orf68      | 8.62E-05 | ESR1      |
| rs9462994  | 6  | 44601697  | SUPT3H      | rs1003827  | 7  | 92454454  | SAMD9        | 8.68E-05 | SUPT3H    |
| rs16903111 | 8  | 129655958 | hCG_1814486 | rs1981818  | 19 | 38306962  | GPATCH1      | 8.72E-05 | GPATCH1   |
| rs508609   | 9  | 132382895 | FUBP3       | rs2251521  | 10 | 109461321 | LOC100128304 | 8.73E-05 | FUBP3     |
| rs2722242  | 7  | 37840135  | TXNDC3      | rs642698   | 18 | 46676983  | ME2          | 8.76E-05 | TXNDC3    |
| rs12364769 | 11 | 15357829  | SOX6        | rs226275   | 21 | 26919581  | ADAMTS1      | 8.77E-05 | SOX6      |
| rs376027   | 3  | 9015714   | SRGAP3      | rs227811   | 6  | 44779065  | SUPT3H       | 8.77E-05 | SUPT3H    |
| rs508609   | 9  | 132382895 | FUBP3       | rs2070947  | 21 | 45165271  | ITGB2        | 8.85E-05 | FUBP3     |
| rs10276111 | 7  | 120711574 | C7orf58     | rs2251842  | 10 | 56527584  | ZWINT        | 8.88E-05 | C7orf58   |
| rs12278251 | 11 | 15373266  | SOX6        | rs2511989  | 11 | 57134901  | SERPING1     | 8.93E-05 | SOX6      |
| rs10832406 | 11 | 15320598  | SOX6        | rs2114322  | 12 | 47237874  | LALBA        | 8.93E-05 | SOX6      |
| rs13001719 | 2  | 224536542 | MRPL44      | rs1981818  | 19 | 38306962  | GPATCH1      | 8.98E-05 | GPATCH1   |
| rs11965062 | 6  | 20755941  | CDKAL1      | rs4411357  | 13 | 28910312  | KIAA0774     | 9.04E-05 | CDKAL1    |
| rs6543018  | 2  | 101096720 | TBC1D8      | rs10805387 | 5  | 63903306  | RGS7BP       | 9.04E-05 | TBC1D8    |
| rs3923657  | 4  | 151138248 | DCLK2       | rs6980043  | 7  | 120733990 | WNT16        | 9.08E-05 | WNT16     |
| rs1861044  | 4  | 15148596  | CC2D2A      | rs16949339 | 16 | 49693508  | SALL1        | 9.10E-05 | SALL1     |
| rs4314538  | 6  | 983781    | LOC285768   | rs2060712  | 7  | 37858182  | TXNDC3       | 9.10E-05 | TXNDC3    |
| rs2092322  | 1  | 22308310  | WNT4        | rs12603186 | 17 | 11159432  | FLJ45455     | 9.13E-05 | WNT4      |
| rs4869742  | 6  | 151949441 | C6orf97     | rs9297604  | 8  | 120820193 | TAF2         | 9.49E-05 | C6orf97   |
| rs1322667  | 6  | 44577984  | SUPT3H      | rs12358575 | 10 | 122952924 | FGFR2        | 9.51E-05 | SUPT3H    |
| rs7942880  | 11 | 15983418  | SOX6        | rs8032944  | 15 | 58681733  | RORA         | 9.62E-05 | SOX6      |
| rs11023685 | 11 | 15666560  | SOX6        | rs7206547  | 16 | 10259963  | ATF7IP2      | 9.68E-05 | SOX6      |
| rs1470719  | 7  | 37857390  | TXNDC3      | rs9901757  | 17 | 78556620  | B3GNTL1      | 9.72E-05 | TXNDC3    |
| rs11808673 | 1  | 193939480 | KCNT2       | rs4498013  | 3  | 40994892  | CTNNB1       | 9.83E-05 | CTNNB1    |

|           |   |           |           |            |    |           |           |          |           |
|-----------|---|-----------|-----------|------------|----|-----------|-----------|----------|-----------|
| rs2392540 | 7 | 38225879  | STARD3NL  | rs7044318  | 9  | 34544999  | CNTFR     | 9.84E-05 | STARD3NL  |
| rs7046334 | 9 | 132461091 | FUBP3     | rs7295312  | 12 | 77285557  | LOC642550 | 9.89E-05 | FUBP3     |
| rs7559325 | 2 | 101097003 | TBC1D8    | rs10877778 | 12 | 60667209  | FAM19A2   | 9.89E-05 | TBC1D8    |
| rs2074395 | 4 | 105734496 | TET2      | rs6975425  | 7  | 38128043  | STARD3NL  | 9.91E-05 | STARD3NL  |
| rs7825904 | 8 | 119998469 | TNFRSF11B | rs8001679  | 13 | 110764641 | LOC731227 | 9.97E-05 | TNFRSF11B |
| rs429004  | 8 | 15699452  | MSR1      | rs1870097  | 10 | 28581478  | MPP7      | 9.99E-05 | MPP7      |

---

Note, for each pair of genes, the most significant pair of SNPs was shown in this table. Gene\_GWAS means genes identified by previous GWASs.
